# Supplementary material
Source: PubMed Central journal article supplement (PMC4790607)
Supplement: zwir005108.ww1_default.pdf [file zwir005108.ww1_default.pdf]

**Supplementary Table** Characteristics of 9889 athletes from 43 Olympic disciplines

| <b>Discipline</b>                        | <b>No (%)</b> | <b>Cardiovascular intensity*</b> | <b>Static intensity*</b> | <b>Dynamic intensity*</b> | <b>Risk of bodily collision*</b> | <b>Physical contact†</b> |
|------------------------------------------|---------------|----------------------------------|--------------------------|---------------------------|----------------------------------|--------------------------|
| Alpine skiing                            | 27 (0.3)      | High                             | High                     | Moderate                  | Yes                              | High                     |
| Archery                                  | 66 (0.7)      | Low                              | Moderate                 | Low                       | No                               | Low                      |
| Basketball                               | 26 (0.3)      | High                             | Moderate                 | High                      | Yes                              | High                     |
| Biathlon                                 | 8 (0.1)       | Moderate                         | Low                      | High                      | No                               | Moderate                 |
| Bobsledding                              | 91 (0.9)      | Moderate                         | High                     | Low                       | Yes                              | Moderate                 |
| Boxing                                   | 277 (2.8)     | High                             | High                     | High                      | Yes                              | High                     |
| Canoeing                                 | 28 (0.3)      | High                             | High                     | High                      | No                               | Low                      |
| Cricket                                  | 14 (0.1)      | Low                              | Low                      | Low                       | No                               | Moderate                 |
| Cross-country skiing                     | 152 (1.5)     | Moderate                         | Low                      | High                      | No                               | Moderate                 |
| Curling                                  | 12 (0.1)      | Low                              | Low                      | Low                       | No                               | Low                      |
| Cycling                                  | 388 (3.9)     | High                             | High                     | High                      | Yes                              | Moderate                 |
| Decathlon (athletics)                    | 86 (0.9)      | High                             | High                     | High                      | No                               | Moderate                 |
| Diving                                   | 157 (1.6)     | Low                              | Moderate                 | Low                       | Yes                              | High                     |
| Equestrian                               | 315 (3.2)     | Low                              | Moderate                 | Low                       | Yes                              | Moderate                 |
| Fencing                                  | 561 (5.7)     | Low                              | Low                      | Moderate                  | No                               | Moderate                 |
| Field hockey                             | 159 (1.6)     | Moderate                         | Low                      | High                      | Yes                              | High                     |
| Figure skating                           | 90 (0.9)      | Moderate                         | Moderate                 | Moderate                  | No                               | Moderate                 |
| Golf                                     | 65 (0.7)      | Low                              | Low                      | Low                       | No                               | Low                      |
| Gymnastics                               | 687 (6.9)     | Moderate                         | High                     | Low                       | Yes                              | Low                      |
| Handball                                 | 21 (0.2)      | High                             | Moderate                 | High                      | No                               | High                     |
| Ice hockey                               | 202 (2.0)     | High                             | Moderate                 | High                      | Yes                              | High                     |
| Jumping events (athletics)               | 343 (3.5)     | Moderate                         | Moderate                 | Moderate                  | No                               | Moderate                 |
| Lacrosse                                 | 32 (0.3)      | High                             | Moderate                 | High                      | Yes                              | High                     |
| Marathon (athletics)                     | 203 (2.1)     | Moderate                         | Low                      | High                      | No                               | Low                      |
| Middle/long-distance running (athletics) | 614 (6.2)     | High                             | Moderate                 | High                      | No                               | Low                      |
| Modern pentathlon                        | 83 (0.8)      | High                             | Moderate                 | High                      | No                               | Moderate                 |
| Nordic combined                          | 39 (0.4)      | Moderate                         | Low                      | High                      | No                               | Moderate                 |
| Polo                                     | 67 (0.7)      | Low                              | Moderate                 | Low                       | Yes                              | Moderate                 |

|                             |           |          |          |          |     |          |
|-----------------------------|-----------|----------|----------|----------|-----|----------|
| Race walking (athletics)    | 100 (1.0) | Moderate | Low      | High     | No  | Low      |
| Racquet                     | 7 (0.1)   | Moderate | Low      | High     | No  | Moderate |
| Rowing                      | 657 (6.6) | High     | High     | High     | No  | Low      |
| Rugby                       | 98 (1.0)  | Moderate | Moderate | Moderate | Yes | High     |
| Sailing                     | 455 (4.6) | Moderate | High     | Low      | No  | Low      |
| Shooting                    | 569 (5.8) | Low      | Low      | Low      | No  | Low      |
| Skeleton                    | 1 (0.0)   | Moderate | High     | Low      | Yes | Moderate |
| Soccer                      | 783 (7.9) | Moderate | Low      | High     | Yes | High     |
| Speed skating               | 72 (0.7)  | High     | High     | High     | Yes | Moderate |
| Sprint (athletics)          | 719 (7.3) | Moderate | Moderate | Moderate | No  | Low      |
| Swimming                    | 434 (4.4) | High     | Moderate | High     | No  | Low      |
| Tennis                      | 245 (2.5) | Moderate | Low      | High     | No  | Low      |
| Throwing events (athletics) | 316 (3.2) | Moderate | High     | Low      | No  | Low      |
| Weightlifting               | 133 (1.3) | Moderate | High     | Low      | Yes | Moderate |
| Wrestling                   | 487 (4.9) | High     | High     | Moderate | Yes | High     |

\*According to the American College of Cardiology.<sup>26</sup>

†According to the American Academy of Pediatrics.<sup>27</sup>
